# Supplementary material for: Chiral modification of platinum: ab initio study of the effect of hydrogen coadsorption on stability and geometry of adsorbed cinchona alkaloids
Source: Royal Society of Chemistry journal article supplement (doi:10.1039/c5cp04792g), 2015-01-01
Supplement: c5cp04792g1.pdf [file c5cp04792g1.pdf]

**Supplementary information for:**

**Chiral modification of platinum: Ab initio study**

**of the effect of hydrogen coadsorption on**

**stability and geometry of adsorbed cinchona**

**alkaloids**

Konstanze R. Hahn,<sup>†</sup> Ari P. Seitsonen,<sup>‡</sup> and Alfons Baiker\*,<sup>¶</sup>

*<sup>†</sup>Department of Physics, University of Cagliari, Cittadella Universitaria, I-09048  
Monserrato, Italy*

*<sup>‡</sup>Department of Chemistry, Ecole Normale Supérieure, F-75005 Paris, France*

*<sup>¶</sup>Department of Chemistry and Applied Biosciences, ETH Zurich, Hönggerberg, HCI,  
CH-8093 Zurich, Switzerland*

E-mail: [alfons.baiker@chem.ethz.ch](mailto:alfons.baiker@chem.ethz.ch)

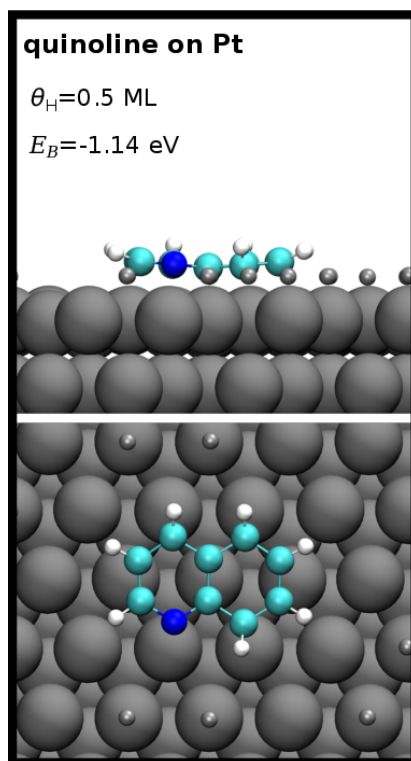

Figure 1: Stable configuration of quinoline on Pt(111) with  $\theta_{\text{H}}=0.5 \text{ ML}$  where the H atoms are segregated to leave enough active sites for the quinoline molecule to adsorb.

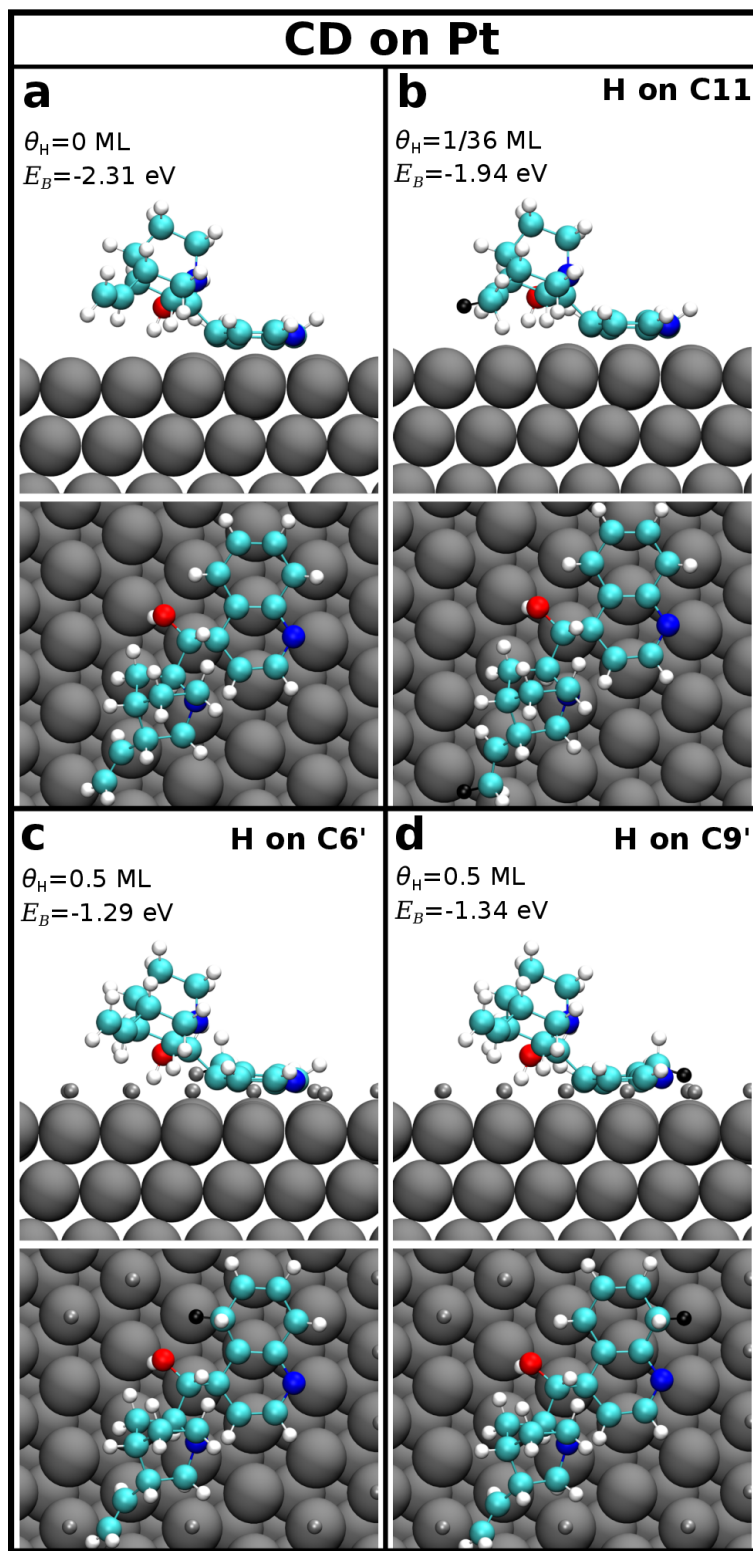

Figure 2: Stable configurations of CD on (a) clean Pt(111), (b) with  $\theta_H=1/36$  ML with the H atom transferred to the C11 atom and with  $\theta_H=0.5$  ML and (c) H transfer to the C6' atom and (d) to the C9' atom.

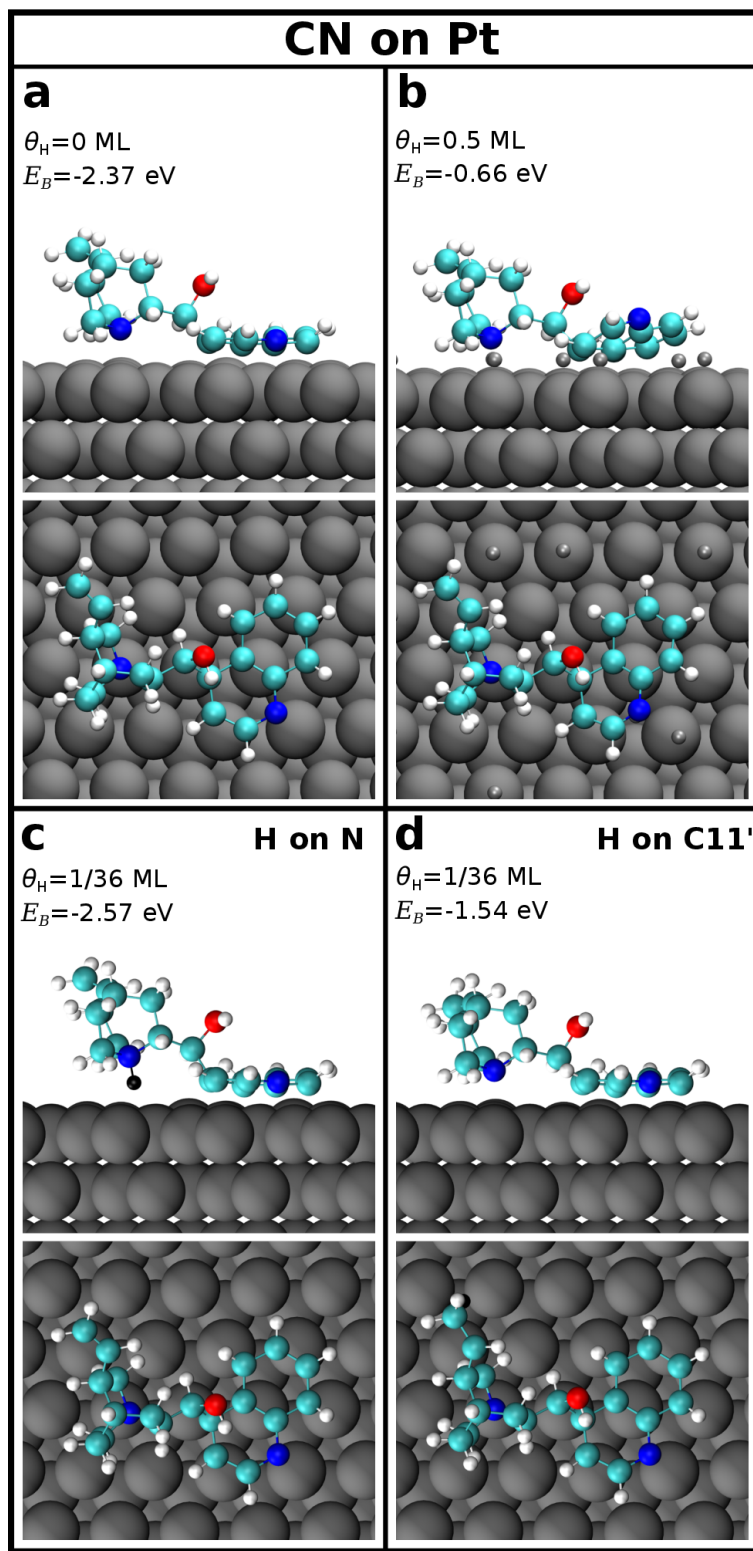

Figure 3: Stable configurations of CN on (a) clean Pt(111), (b) with  $\theta_{\text{H}}=0.5$  ML and H atoms adsorbed on active sites and with  $\theta_{\text{H}}=1/36$  ML and (c) H transfer to the N atom of the quinuclidine moiety and (d) the C11 atom.
